# Supplementary material
Source: Royal Society of Chemistry journal article supplement (doi:10.1039/d6ta01913g)
Supplement: d6ta01913g1.pdf [file d6ta01913g1.pdf]

1 **Supporting Information**

2

3 **Carrier dynamics tailored by electron/hole trapping domains in**  
4 **asymmetric graphitic carbon nitride for superior photocatalytic**  
5 **hydrogen evolution**

6 *Hao Yang<sup>a</sup>, Shaodong Sun<sup>a,b\*</sup>, Honghong Wang<sup>a</sup>, Qing Yang<sup>a,b</sup>, Anran Chen<sup>c\*</sup>, and Jie Cui<sup>a,b\*</sup>*

7

8 *<sup>a</sup>Engineering Research Center of Conducting Materials and Composite Technology, Ministry of Education;*  
9 *Shaanxi Engineering Research Center of Metal-Based Heterogeneous Materials and Advanced*  
10 *Manufacturing Technology; Shaanxi Province Key Laboratory for Electrical Materials and Infiltration*  
11 *Technology; School of Materials Science and Engineering, Xi'an University of Technology, Xi'an 710048,*  
12 *Shaanxi, People's Republic of China.*

13 *<sup>b</sup>Shaanxi Laboratory of Advanced Materials, Xi'an 710021, Shaanxi, People's Republic of China.*

14 *<sup>c</sup>Yunnan Key Laboratory of Electromagnetic Materials and Devices, School of Materials and Energy, Yunnan*  
15 *University, Kunming 650091, Yunnan, People's Republic of China.*

16

17 **E-mail:** sdsun@xaut.edu.cn (S. D. Sun), anran@ynu.edu.cn (A. R. Chen), cuijie@xaut.edu.cn (J. Cui).

18

19

## 20 **Table of Contents**

21

### 22 **S1. Experimental section**

23 **S1.1** Materials and chemical reagents

24 **S1.2** Characterization

25 **S1.3** Photoelectrochemical test

26 **S1.4** Photocatalytic hydrogen evolution experiment

27 **S1.5** Computation methods

28 **S1.6** Probe-labeled EPR measurement

29 **S1.7** The calculation method for the built-in electric field

30 **S1.8** The calculation method for other data

31

### 32 **S2. Supplementary Figures**

33 **Figure S1.** Space-charge region of an n-type semiconductor at the interface.

34 **Figure S2.** TEM images of (a) BCN, (b) NTD-CN, and (c–d) EHTD-CN.

35 **Figure S3.** SEM images of (a) BCN and (b) NTD-CN, (c) HTD-CN, (d) ETD-CN, (e) EHTD-CN samples.

36 **Figure S4.** SEM image of EHTD-CN-BA-0.6.

37 **Figure S5.** SEM images of (a) MCA-OH-1, (b) MCA-OH-3, and (c) MCA-OH-4.

38 **Figure S6.** SEM images of (a) EHTD-CN-OH-1, (b) EHTD-CN-OH-3, and (c) EHTD-CN-OH-4.

39 **Figure S7.** XRD patterns of commercial MA and MCA-EHTD series precursors.

40 **Figure S8.** Pore size distribution curves of BCN, NTD-CN and EHTD-CN.

41 **Figure S9.** (a) XRD patterns of BCN,NTD-CN, HTD-CN, ETD-CN and EHTD-CN. (b) XRD patterns of EHTD-  
42 CN-BA0 (ETD-CN), EHTD-CN-BA0.1 and EHTD-CN-BA0.6. (c) XRD patterns of EHTD-CN-OH-1, EHTD-CN-OH-3  
43 and EHTD-CN-OH-4.

44 **Figure S10.** XRD patterns of commercial MA and MCA-EHTD series precursors.

45 **Figure S11.** FTIR spectra of EHTD-CN-BA0.1, EHTD-CN-BA0.45 and EHTD-CN-BA0.6.

46 **Figure S12.** FTIR spectra of supramolecular intermediates and their derived EHTD-CN-OH-1, EHTD-CN-  
47 OH-3 and EHTD-CN-OH-4.

48 **Figure S13.** XPS spectra of full survey spectra of BCN, NTD-CN, HTD-CN, ETD-CN and EHTD-CN.

49 **Figure S14.** (a) SEM image of used EHTD-CN after recycling tests, (b) XRD patterns and (c) FTIR spectra of  
50 fresh sample and used sample.

51 **Figure S15.** XPS spectra of used sample after 12 h cycling experiments, (a) full survey spectra, (b) C 1s, (c)  
52 N 1s, (d) O 1s high-resolution spectra.

53 **Figure S16.** Macroscopic photograph of 0.1g of BCN (left), NTD-CN (middle), and EHTD-CN (right).

54 **Figure S17.** Mott-Schottky curves of (a) BCN, (b) NTD-CN and (c) EHTD-CN.

55 **Figure S18.** Schematic band structure of BCN, NTD-CN and EHTD-CN.

- 56 **Figure S19.** Schematic diagram of TA signal at different timescales for BCN.
- 57 **Figure S20.** KPFM surface morphologies of BCN and EHTD-CN.
- 58 **Figure S21.** Surface photocharge density of NTD-CN.
- 59 **Figure S22.** Schematic diagram of the conversion process for the reduction of TEMPO to TEMPOH by  
60 electrons.
- 61 **Figure S23.** Cyclic voltammetry curves of (a) BCN, (b) NTD-CN and (c) EHTD-CN at different scan rates.
- 62 **Fig. S24.** The calculation model of H\* adsorption free energy for (a) BCN and (b) EHTD-CN.
- 63
- 64 **S3. Supplementary Tables**
- 65 **Table S1.** The elemental analyses of samples determined by organic element analyzer.
- 66 **Table S2.** Comparison of the photocatalytic hydrogen production performance for UTM CN and other  
67 recently reported carbon nitrides.
- 68 **Table S3.** Slope values obtained from the Mott-Schottky plots at 1000 Hz for BCN, NTD-CN, and EHTD-  
69 CN.
- 70 **Table. S4.** The fitted TA decay dynamics of BCN and EHTD-CN.

## 71 **S1. Experimental section**

### 72 **S1.1 Materials and chemical reagents**

73 Melamine (MA), cyanuric acid, triethanolamine (TEOA) and 2,2,6,6-tetramethylpiperidine-  
74 1-oxyl (TEMPO) were purchased from Shanghai Aladdin Biochemical Technology Co., Ltd.  
75 Barbituric acid (BA), chloroplatinic acid ( $\text{H}_2\text{PtCl}_6$ ) were purchased from Shanghai Macklin  
76 Biochemical Co., Ltd. The anhydrous ethanol was purchased from Tianjin Fuyu Fine Chemical  
77 Co., Ltd. Sodium sulfate ( $\text{Na}_2\text{SO}_4$ ) was purchased from Shanghai Yi'en chemical technology Co.,  
78 Ltd. All the reagents were used without further purification. Ultrapure water was used  
79 throughout the experiment.

### 80 **S1.2 Characterization**

81 The morphologies of the samples were obtained by scanning electron microscope (SEM,  
82 JSM-7000F), and transmission electron microscope (TEM, JEM-2100). Powder X-ray diffraction  
83 (XRD) analyses were collected on a Bruker D8 Advanced X-ray diffractometer using  $\text{Cu K}\alpha$   
84 radiation (40 KV, 40 mA). Fourier transform infrared (FTIR) spectra for all samples were  
85 conducted by Bruker Tensor 27 spectrometer scanning. X-ray photoelectron spectroscopy  
86 (XPS) and their valence-band spectra were recorded by a Thermofisher scalable 250xi  
87 instrument equipped with an  $\text{Al K}\alpha$  X-ray source. The elemental determinations were  
88 measured by the element analyzer (UNICUBE - Elementar). The  $^{13}\text{C}$  solid-state cross  
89 polarization magic angle spinning nuclear magnetic resonance (CP-MAS NMR) spectra were  
90 taken on a Bruker avance III 400 MHz. The Brunauer-Emmett-Teller (BET) surface areas of  
91 samples were recorded by the nitrogen adsorption-desorption method at 77 K on a  
92 Quantachrome apparatus. The pore size distribution curves were surveyed using the Barrett-  
93 Joyner-Halenda (BJH) model. The photoluminescence (PL, FluoroMax-4P) spectra were  
94 measured by a fluorescence spectrophotometer with an excitation wavelength of 350 nm.  
95 Temperature-dependent PL spectra (FLS1000) were measured by at 80 K, 100 K, 120 K, 140 K,  
96 160 K, 180 K, 200 K, 220 K, 260 K and 300 K. The femtosecond transient absorption  
97 spectroscopy (fs-TA) was measured on a Helios pump-probe system from Ultrafast Systems  
98 LLC coupled with an amplified femtosecond laser system from Coherent. The optical  
99 parametric amplifier (TOPAS-800-fs) delivered a 350 nm pump pulse ( $\sim 0.1$  mW), which was  
100 generated by a Ti-sapphire regenerative amplifier (800 nm, 35 fs, 6 mJ/pulse, and 1 kHz  
101 repetition rate). The surface potentials were measured by in-situ KPFM on a Bruker Dimension  
102 Icon. The samples were dispersed in ethanol via sonication, then spin-coated onto ITO for

103 testing. Subsequently, the contact potential differences of the samples were recorded under  
104 dark and light irradiation, respectively. Contact angle measurements were taken on a KRUSS  
105 DSA100 contact angle meter. UV-visible diffuse reflectance spectra (UV-vis DRS, LAMBDA950)  
106 were recorded using a UV/vis/NIR spectrophotometer. Electron paramagnetic resonance  
107 (EPR) analyses were detected on an EMX nano BRUKER spectrometer.

### 108 **S1.3 Photoelectrochemical test**

109 The photoelectrochemical properties, including Mott-Schottky plots (M-S), electrochemical  
110 impedance spectra (EIS), and transient photocurrent response (TPR), and open circuit  
111 potential-time plots (OCPT), cyclic voltammetry curves (CV), linear sweep voltammetry curves  
112 (LSV) were evaluated in a 0.25 M Na<sub>2</sub>SO<sub>4</sub> aqueous solution using an electrochemical  
113 workstation (CHI660E) with a three-electrode system under simulated visible light irradiation.  
114 The photocatalyst-coated F-doped tin oxide conductive glass (FTO), a Pt mesh, and an Ag/AgCl  
115 electrode acted as the working electrode, the counter electrode, and the reference electrode,  
116 respectively. The working electrode was prepared as follows: 10 mg of the photocatalyst was  
117 dispersed in 1 mL of Nafion solution (5 wt%) with the assistance of ultrasound. Then, the slurry  
118 was dropped onto a FTO with an exposed area of 1 cm × 1 cm and dried in the air to form a  
119 working electrode.

### 120 **S1.4 Photocatalytic hydrogen evolution experiment**

121 Photocatalytic hydrogen evolution reactions of samples were carried out by an online  
122 photocatalytic hydrogen generation system (Beijing Perfect-light Science & Technology Co.,  
123 Ltd., China) with a 250 mL closed quartz reactor and a circulating water system. The light  
124 source was a 300 W Xe lamp ( $\lambda > 420$  nm, Beijing Perfect-light, PLS-SXE300). The experiment  
125 process was described as follows: 50 mg of as-prepared samples were dispersed in 100 mL of  
126 the aqueous solution containing TEOA (10 vol%) as an electron donor, with ultrasound for 20  
127 min. The H<sub>2</sub>PtCl<sub>6</sub> aqueous solution acted as the source of the cocatalyst (3 wt% Pt) and was  
128 added to the suspension and irradiated for 60 min to ensure that the Pt was loaded tightly on  
129 the photocatalyst surface. Afterward, the reaction vessel was completely degassed to remove  
130 air before being further irradiated. The temperature of the reaction solution was maintained  
131 at 6 °C by cooling the circulating water system during the photocatalytic hydrogen evolution  
132 reaction.

133 The apparent quantum efficiency (AQE) for hydrogen evolution was measured using the  
134 same experimental conditions, except that the Xe lamp equipped with a band-pass filter ( $\lambda =$

135  $420 \pm 10$  nm,  $450 \pm 10$  nm,  $475 \pm 10$  nm,  $550 \pm 10$  nm). The light intensity is obtained with an  
 136 optical power meter (CEL-NP2000, Beijing). The AQE was calculated as follows:

$$137 \quad P = \times A_R \quad (\text{Equation S1})$$

$$138 \quad N_P^i = \frac{Pt\lambda}{hc} \quad (\text{Equation S2})$$

$$139 \quad N_e = 2 \times n_{H_2} \times N_A \quad (\text{Equation S3})$$

$$140 \quad \text{AQE} = \frac{N_e}{N_P^i} \times 100\% \quad (\text{Equation S4})$$

### 141 **S1.5 Computation methods**

142 Differential charge density analysis and density of states of BCN and EHTD-CN were  
 143 performed based on the density function theory (DFT) calculations implemented in the Vienna  
 144 *ab initio* simulation package (VASP) code[1-4]. The projected augmented wave (PAW) method  
 145 within the generalized gradient approximation of Perdew, Burke, and Ernzerhof (PBE) was  
 146 selected to treat exchange-correlation effects[5]. To minimize the interaction between  
 147 neighboring slabs, a 15 Å vacuum region was chosen as the periodic boundary condition. The  
 148 energy cutoff was 500 eV. The atomic positions were relaxed until forces on each atom were  
 149 less than 0.02 eV/Å. For the geometry optimization, a Monkhorst-Pack grid of  $3 \times 3 \times 1$  *k*-point  
 150 was adopted. For the static calculations, a Monkhorst-Pack grid of  $7 \times 7 \times 1$  *k*-point was adopted.  
 151 Then, based on the optimized crystal structure, the electronic structures were calculated.

152 The calculations of surface electrostatic potential, Frontier molecular orbital calculation,  
 153 and Gibbs free energy for hydrogen absorption were carried out with the Gaussian software  
 154 program with B3LYP and a 6-31G\* basis set. The HOMO, LUMO distributions, and electrostatic  
 155 potential (ESP) were obtained and mapped using the Multiwfn program and VMD software.  
 156 The adsorption energy of H ( $\Delta E_{H^*}$ ) on BCN and EHTD-CN were defined as  $E_{H^*} = E_{\text{EHTD-CN+H}^*} -$   
 157  $E_{\text{EHTD-CN}} - 1/2E_{H_2}$ , where  $E_{\text{EHTD-CN+H}^*}$  and  $E_{\text{EHTD-CN}}$  are the total energies of  $\text{EHTD-CN}$  with and  
 158 without H adsorption, respectively, and  $E_{H_2}$  represents the energy of a  $H_2$  molecule. The H  
 159 adsorption free energy ( $\Delta G_{H^*}$ ) was defined as follows [6]:

$$160 \quad G_{H^*} = E_{H^*} - \Delta E_{\text{ZPE}} - T\Delta S$$

161 where  $\Delta E_{\text{ZPE}}$  and  $\Delta S$  are the changes in zero-point energy and entropy between H desorption  
 162 and adsorption, respectively.

163 **S1.6 Probe-labeled EPR measurement**

164 TEMPO-labeled EPR measurement for e<sup>-</sup>: 1 mg of prepared samples (BCN, NTD-CN and  
165 EHTD-CN) were dispersed into 1 mL of deionized water (containing 10 vol% TEOA) and  
166 sonicated for 30 min. The 5 μL of TEMPO solution (10 mM) serving as a trapping agent for e<sup>-</sup>  
167 was added into 45 μL of the above aqueous solution.

168 DMPO-labeled EPR measurement for •O- 2: 1 mg of prepared samples (BCN, NTD-CN and  
169 EHTD-CN) were dispersed into 1 mL of methanol and sonicated for 30 min. The 5 μL of DMPO  
170 serving as a trapping agent for •O- 2 was added into 45 μL of the above methanol solution.

171 Subsequently, the well-mixed solution was irradiated for 10 min with a 300 W xenon lamp  
172 as a light source. Next, the solution before and after illumination was drawn separately with  
173 a capillary tube and carefully placed into the sample chamber of the EPR spectrometer to  
174 obtain the EPR spectra. The scan number was set as 5 times.

175 **S1.7 The calculation method for the built-in electric field**

176 The strength of the built-in electric field can be described by Poisson's equation[7-9]:

$$177 \quad E = \frac{eN_d}{\epsilon_0 \epsilon_r W(V_s)} \quad (\text{Equation S5})$$

178 where eN<sub>d</sub> is the surface charge density, here defined as -ρ; The ε<sub>0</sub> and ε<sub>r</sub> are the dielectric  
179 constant of the graphitic carbon nitride and vacuum dielectric constant, respectively. W(V<sub>s</sub>) is  
180 the width of the space charge region, which can be described as:

$$181 \quad W(V_s) = \sqrt{\frac{2\epsilon_0 \epsilon_r V_s}{eN_d}} \quad (\text{Equation S6})$$

182 Therefore,

$$183 \quad E = \sqrt{\frac{-2 \rho V_s}{\epsilon_0 \epsilon_r}} \quad (\text{Equation S7})$$

184 Here, V<sub>s</sub> is the surface response voltage, which can be measured by OCPT. As illustrated in  
185 Figure S1, given that the Fermi level of the n-type semiconductor locates above its surface  
186 states, when the photocatalyst is subjected to light exposure, electrons near the surface travel  
187 across the interface to the catalyst surface. This induces significant band bending and,  
188 consequently, a photovoltage signal that qualifies as a surface response voltage. When the  
189 light is extinguished, the robust built-in electric field effectively curbs charge recombination,  
190 thereby resulting in a slow decay (Figure 7i).

191 In addition,  $\rho$  can be measured by integrating the step region of the photocurrent response  
 192 curve.

193 Normalizing the strength of the built-in electric field for BCN is to 1, the relative built-in  
 194 electric field strength is:

$$195 \quad = \sqrt{\frac{\rho V_s}{(\rho V_s)_{\text{BCN}}}} \quad \text{(Equation S8)}$$

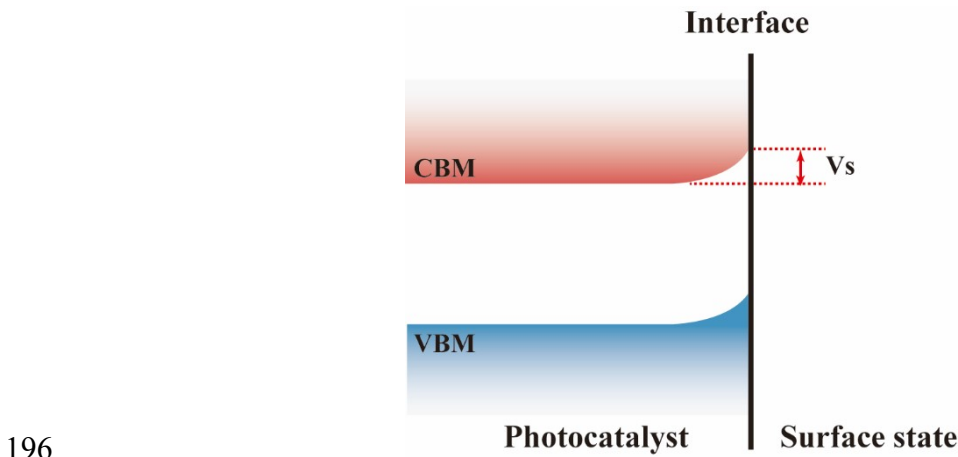

197 **Figure S1.** Space-charge region of an n-type semiconductor at the interface.

198

### 199 S1.8 The calculation method for other data

200 a) Calculations for charge carrier density ( $N_D$ )

201 According to the Equation S5 and Equation S6, the charge carrier density ( $N_D$ ) of various  
 202 photocatalytic materials can be calculated:

$$203 \quad \frac{1}{C^2} = \left[ \frac{2}{e\epsilon\epsilon_0} \right] \times \left( E - E_{\text{fb}} - \frac{k_B T}{e} \right) \quad \text{(Equation S9)}$$

$$204 \quad N_D = \left( \frac{2}{e\epsilon\epsilon_0} \right) \times \left( \frac{d}{dE} \frac{1}{C^2} \right)^{-1} \quad \text{(Equation S10)}$$

205 where C refers to the capacitance of space charge layer, e represents the elementary charge  
 206 ( $1.602 \times 10^{-19}$  C),  $\epsilon$  and  $\epsilon_0$  are the dielectric constant of graphitic carbon nitride ( $\epsilon = 5.25$ ) and  
 207 vacuum permittivity ( $\epsilon_0 = 8.85 \times 10^{-14}$  F/m<sup>2</sup>), respectively, E and  $E_{\text{fb}}$  denote the applied bias  
 208 potential and flat-band potential,  $k_B$  and T signify the Boltzmann constant ( $1.38 \times 10^{-23}$  J/K)  
 209 and Kelvin temperature, respectively [8].

210

211 b) Calculations for exciton binding energy ( $E_b$ ):

212 
$$I(T) = \frac{I_0}{1 + A \times \exp\left(\frac{-E_b}{k_B T}\right)}$$
 (Equation S11)

213 where  $I_0$  and  $I(T)$  represent the PL intensity at 0 K and tested temperature (T),  $k_B$  and stand  
 214 for the Boltzmann constant ( $1.38 \times 10^{-23}$  J/K) and Kelvin temperature, respectively [10].

215 Calculations for excitons dissociation efficiency (DE):

216 
$$DE = \exp\left(\frac{-E_b}{k_B T}\right)$$
 (Equation S12)

217 where  $k_B T \approx 25$  meV at room temperature.

218 **S2. Supplementary Figures and Tables**

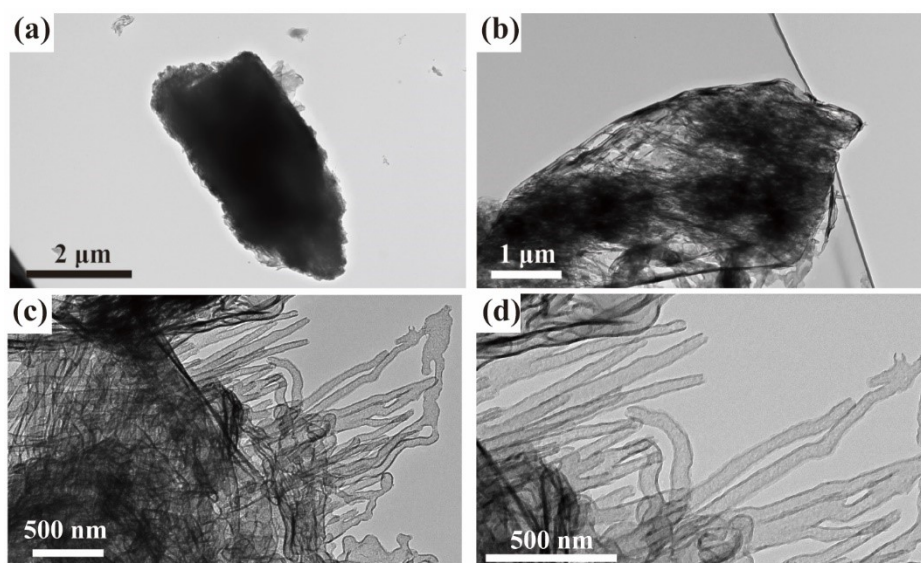

219

220 **Figure S2.** TEM images of (a) BCN, (b) NTD-CN, and (c–d) EHTD-CN.

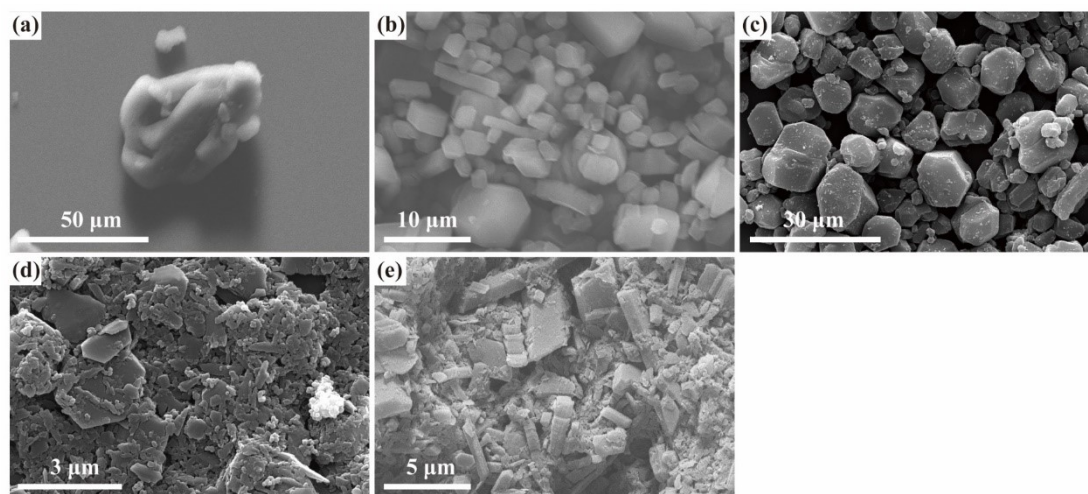

221

222 **Figure S3.** SEM images of (a) commercial melamine and (b) MCA-NTD, (c) MCA-HTD, (d) MCA-  
223 ETD, (e) MCA-EHTD supramolecular precursors.

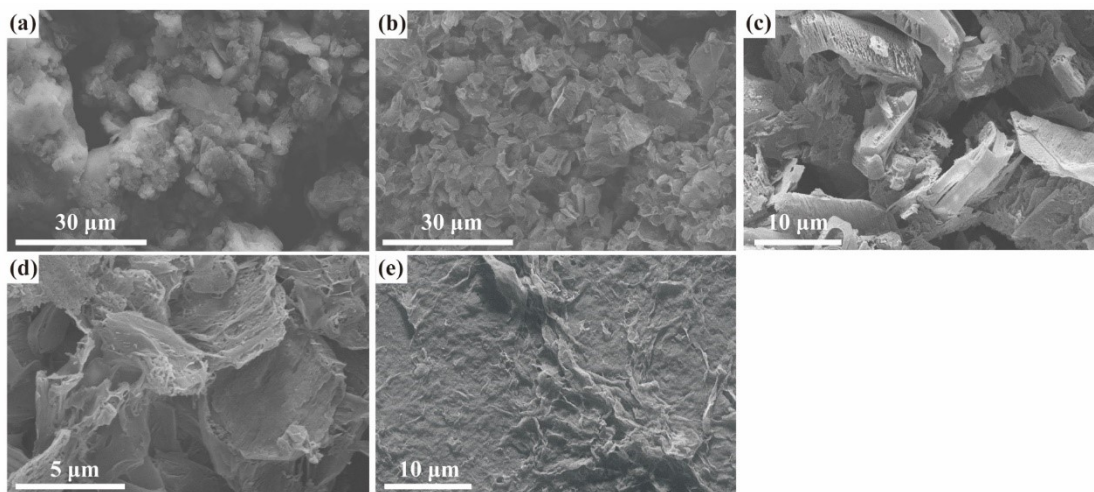

224

225 **Figure S4.** SEM images of (a) BCN, (b) NTD-CN, (c) HTD-CN, (d) ETD-CN, (e) EHTD-CN samples.

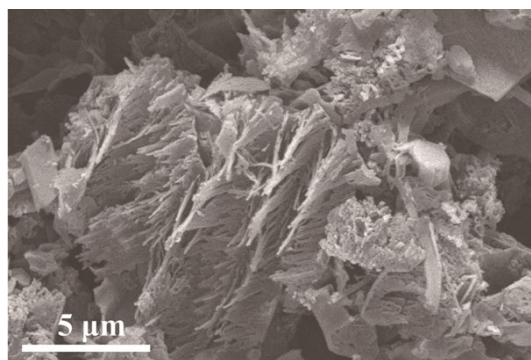

226

227 **Figure S5.** SEM image of EHTD-CN-BA-0.6.

228 SEM images of commercial melamine and various precursors are presented in Figure  
 229 S3. As expected, commercial melamine exhibits an irregular blocky morphology.  
 230 Owing to the similar molecular structure of barbituric acid to melamine and cyanuric  
 231 acid, coupled with its low addition amount, the morphologies of MCA-NTD and MCA-  
 232 HTD supramolecular intermediates show no significant distinction, both displaying a  
 233 characteristic hexagonal prism appearance. Since the solvent polarity affects the  
 234 hydrogen bonding strength between supramolecular building blocks, weakly polar  
 235 ethanol impedes the self-assembly process [11], leading to a morphological  
 236 transformation in MCA-ETD from prismatic structures to worm-like agglomerates.  
 237 Subsequently, the morphology of MCA-EHTD undergoes further fragmentation upon  
 238 the coexistence of barbituric acid and ethanol. These observations are in good

239 agreement with the morphological evolution of synthesized g-C<sub>3</sub>N<sub>4</sub> samples (Figure  
240 S4–Figure S7).

241 Consistent with the evolution principle observed in the supramolecular precursors,  
242 BCN exhibits significant bulk agglomeration. In contrast, NTD-CN and HTD-CN, derived  
243 from the polymerization of hexagonal prism-like MCA-NTD and MCA-HTD  
244 supramolecular intermediates, largely inherit this morphology. This structural  
245 retention stems from the loosely  $\pi$ - $\pi$  stacking of conjugated planes, forming loosely  
246 accordion-like microstructure. The modulation of supramolecular self-assembly  
247 process by weakly polar ethanol solvent also affects the morphology of final products.  
248 As shown in Figure S4d, the original microstructure of NTD-CN collapses into lamellar  
249 stacked aggregates. The morphology of EHTD-CN undergoes further exfoliation,  
250 resulting in a sheet-like structure.

251 When the addition amount of barbituric acid is further increased, its similar  
252 molecular structure to melamine and cyanuric acid, combined with enhanced  
253 protonation effects, partially improves the supramolecular self-assembly process.  
254 Consequently, EHTD-CN-BA-0.6 displays a partially damaged accordion-like  
255 morphology, accompanied by irregular aggregates.

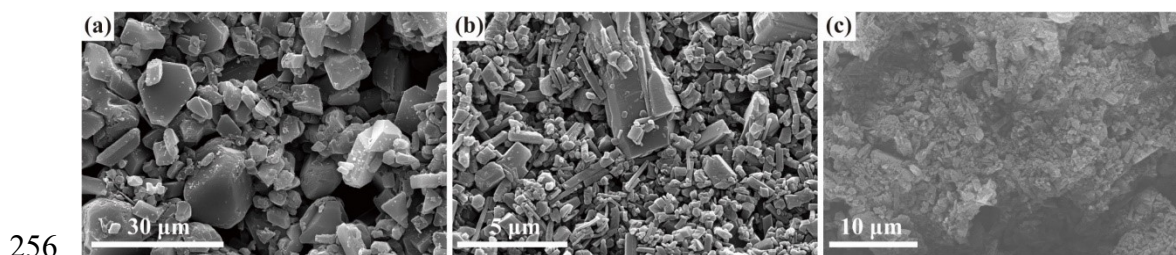

257 **Figure S6.** SEM images of (a) MCA-OH-1, (b) MCA-OH-3, and (c) MCA-OH-4.

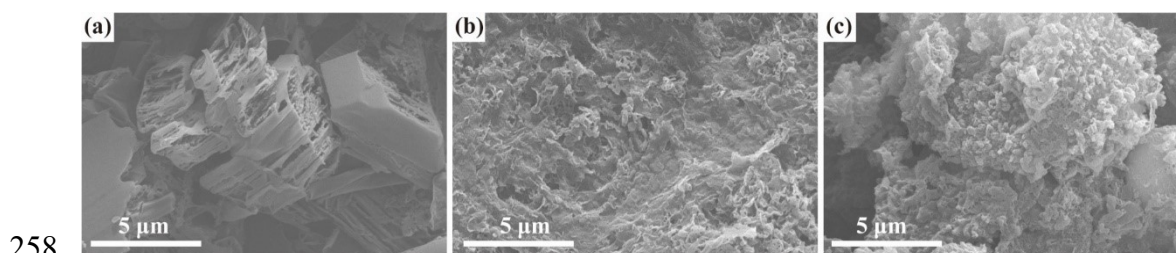

259 **Figure S7.** SEM images of (a) EHTD-CN-OH-1, (b) EHTD-CN-OH-3, and (c) EHTD-CN-OH-4.

260 The regulatory effect of ethanol on the morphology evolution of supramolecular  
 261 intermediates and  $g\text{-C}_3\text{N}_4$  samples was investigated under the fixed barbituric acid  
 262 addition. Specifically, in the strongly polar aqueous solvent, robust hydrogen bonding  
 263 drives the dense stacking of supramolecular planes into hexagonal prism  
 264 morphologies. The addition of ethanol impedes hydrogen bond formation between  
 265 the molecules of melamine, cyanuric acid, and barbituric acid. Consequently, the  
 266 hexagonal prisms progressively fragment until the weakened hydrogen bonding can  
 267 no longer sustain the 3D structure of supramolecular intermediates, collapsing into  
 268 irregular nanoparticles. As shown in Figure S3 and Figure S6, as the proportion of  
 269 ethanol in the mixed solvent increases, the micro-morphology of MCA supramolecules  
 270 gradually transforms from hexagonal prisms (MCA-NTD and MCA-HTD) to irregular  
 271 microparticles (MCA-OH-1), then gradually breaks into a mixture of fragmented micro-  
 272 blocks and small particles (MCA-OH-3), and finally becomes nanoscale particles (MCA-  
 273 OH-4). This trend aligns consistently with the morphological evolution observed in the  
 274  $g\text{-C}_3\text{N}_4$  samples (Figure S4 and Figure S7). When deionized water used as the solvent,  
 275 the EHTD-CN-OH-0 (HTD-CN) exhibits a characteristic accordion-like morphology. As  
 276 the ethanol/water ratio increases, the morphology of EHTD-CN-OH series samples

277 transforms from fragmented accordion-like assemblies to exfoliated sheets.  
278 Subsequently, driven by a self-generated gas-bubble templating effect [12], spherical  
279 bubble-like structures gradually emerge on the surface of sheet-like assemblies. This  
280 ultimately transforms the morphology into a 3D architecture composed of stacked  
281 spherical bubble-like structures. Collectively, these structural evolutions demonstrate  
282 that barbituric acid and ethanol can synergistically modulate the morphology of EHTD-  
283 CN.

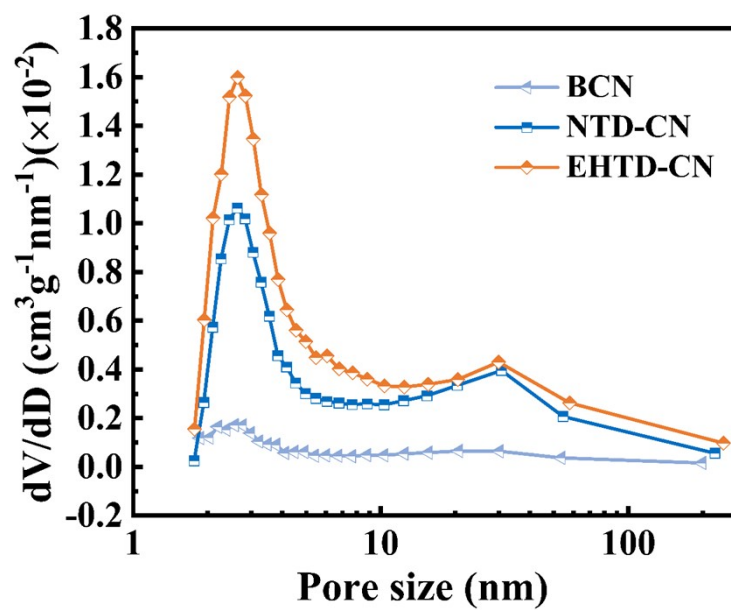

284

285 **Figure S8.** Pore size distribution curves of BCN, NTD-CN and EHTD-CN.

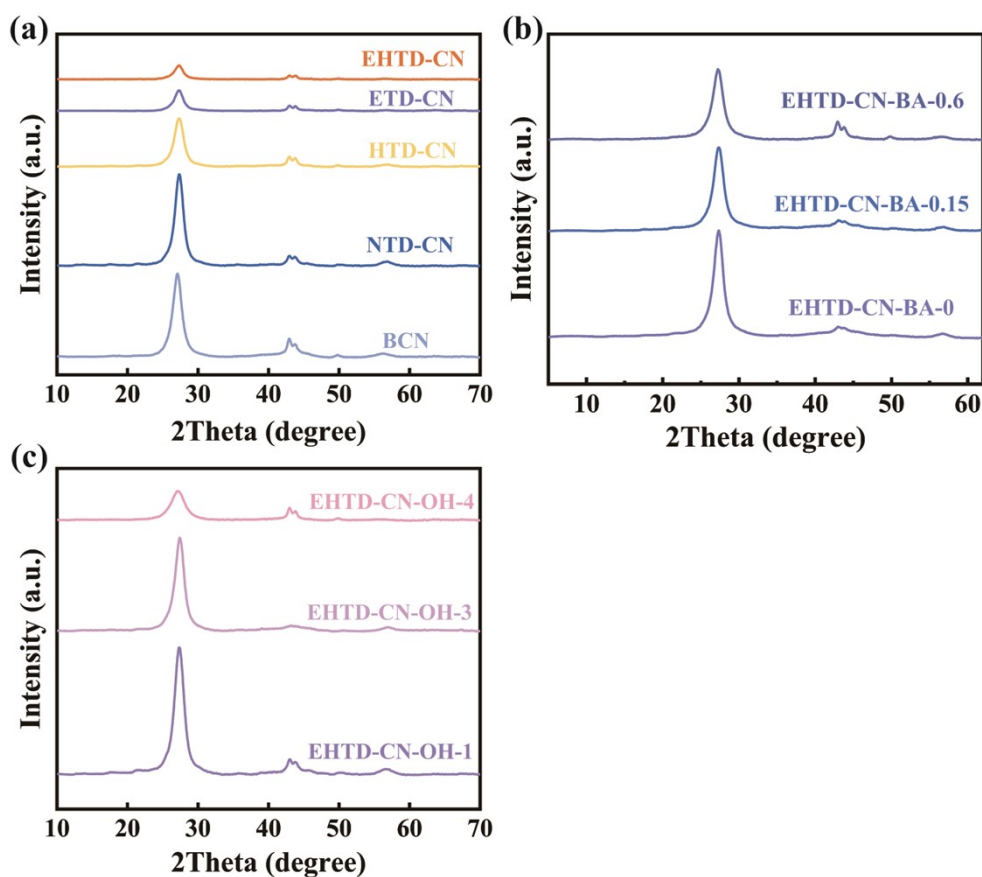

286

287 **Figure S9.** (a) XRD patterns of BCN, NTD-CN, HTD-CN, ETD-CN and EHTD-CN. (b) XRD patterns of  
 288 EHTD-CN-BA0 (ETD-CN), EHTD-CN-BA0.1 and EHTD-CN-BA0.6. (c) XRD patterns of EHTD-CN-OH-1,  
 289 EHTD-CN-OH-3 and EHTD-CN-OH-4.

290 The influences of the concentration of pyrimidine structures (Figure S9b) and  
 291 hydroxyl groups (Figure S9c) on the physical structure of EHTD-CN were also  
 292 investigated. The EHTD-CN-BA series samples exhibit distinct diffraction peaks near  
 293 27.3°. Consistent with the evolution trend observed in SEM images, the diffraction  
 294 peak intensity shows no significant variation, owing to the similar molecular structure  
 295 of barbituric acid to melamine and cyanuric acid, coupled with the enhanced acidic  
 296 environment during supramolecular self-assembly. Conversely, the participation of  
 297 weakly polar ethanol disrupts the ordered self-assembly of molecular building blocks,  
 298 resulting in a progressive attenuation of diffraction peak intensity in EHTD-CN-OH  
 299 series samples. This also reflects the successful introduction of hydroxyl functional  
 300 groups.

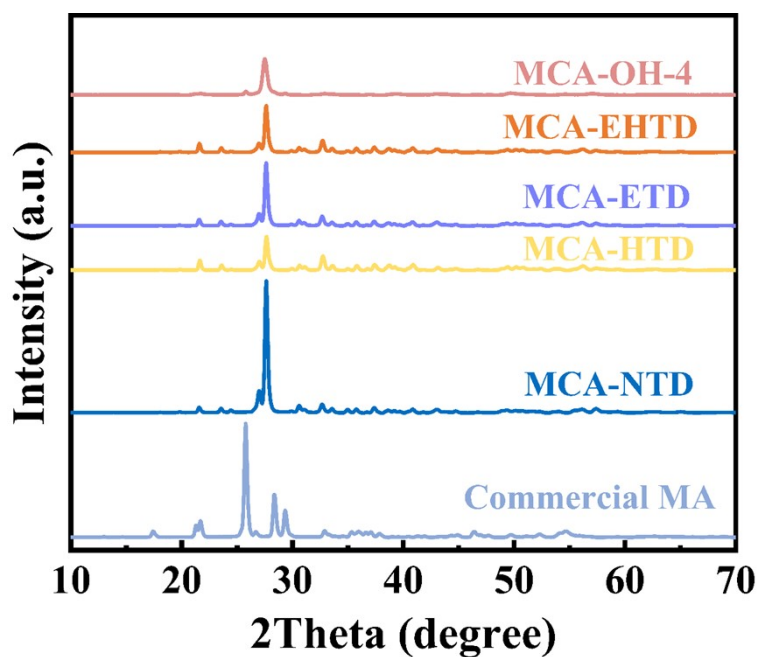

301

302 **Figure S10.** XRD patterns of commercial MA and MCA-EHTD series precursors.

303 As shown in Figure S10, the powder XRD pattern of commercial melamine  
 304 corresponds to monoclinic phase structure. Subsequently, MCA-NTD undergoes a  
 305 transformation to an orthorhombic phase with strong diffraction peaks. This indicates  
 306 that melamine and cyanuric acid undergo supramolecular self-assembly via hydrogen  
 307 bonding in polar aqueous solvent, resulting in their regular stacking into the hexagonal  
 308 prism morphology (Figure S3b). The incorporation of ETD and HTD does not alter the  
 309 fundamental molecular framework of supramolecular intermediate. However, it leads  
 310 to a gradually decrease in diffraction intensity and concomitant fragmentation of the  
 311 morphology (Figure S3e).

312

313

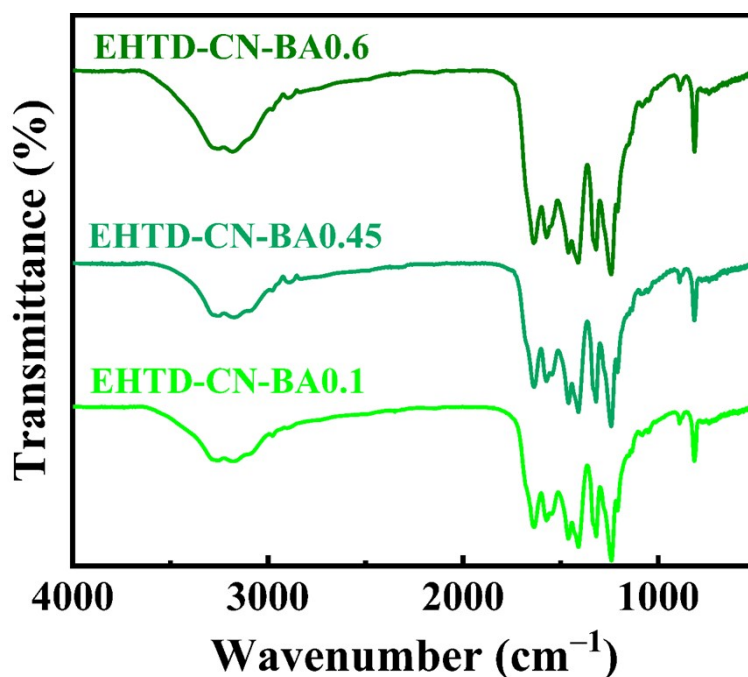

314

315 **Figure S11.** FTIR spectra of EHTD-CN-BA0.1, EHTD-CN-BA0.45 and EHTD-CN-BA0.6.

316 As shown in Figure S11, increasing barbituric acid addition during supramolecular  
 317 self-assembly induces no significantly changes in the FTIR spectra of EHTD-CN-BA  
 318 series samples, except for enhanced vibrational intensity of aromatic heterocycles.  
 319 This confirms that pyrimidine ring incorporation does not disrupt the fundamental  
 320 framework of g-C<sub>3</sub>N<sub>4</sub>.

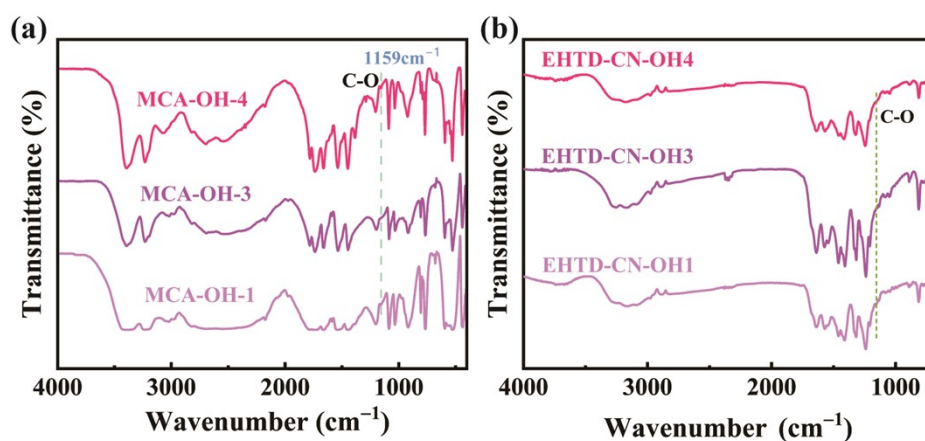

321

322 **Figure S12.** FTIR spectra of supramolecular intermediates and their derived EHTD-CN-OH-1,  
 323 EHTD-CN-OH-3 and EHTD-CN-OH-4.

324 The effect of ethanol/water volume ratio on the molecular structures of  
325 supramolecular intermediates and corresponded g-C<sub>3</sub>N<sub>4</sub> samples was further  
326 investigated (Figure S12). With increasing ethanol proportion, the intensity of C-O  
327 breathing vibration mode at 1159 cm<sup>-1</sup> and asymmetric stretching vibration of  
328 adsorbed water/hydroxyl groups around 3280 cm<sup>-1</sup> in MCA-OH series supramolecular  
329 intermediates gradually increases. These characteristic vibrations persist after  
330 polymerization of the supramolecular intermediates into EHTD-CN-OH series samples.  
331 This result demonstrates that the successful grafting of hydroxyl functional groups at  
332 the edges of heptazine framework.

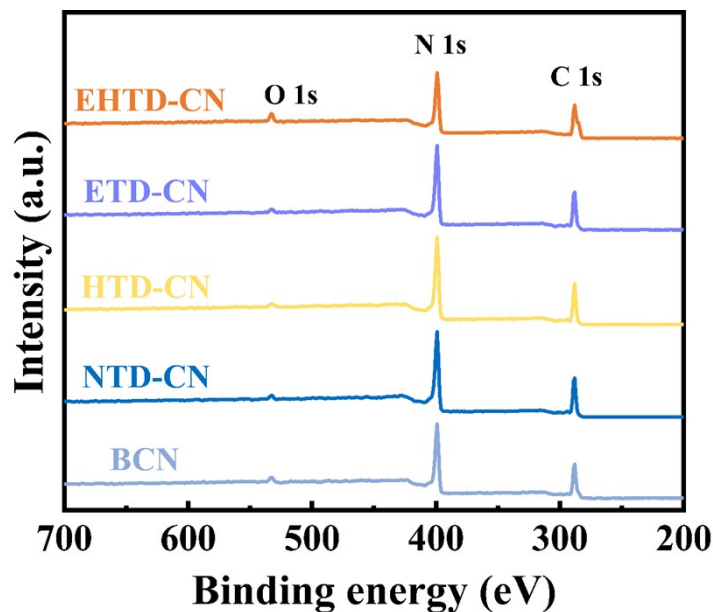

333

334 **Figure S13.** XPS spectra of full survey spectra of BCN, NTD-CN, HTD-CN, ETD-CN and EHTD-CN.

335

336 **Table S1.** The elemental analyses of samples determined by organic element analyzer.

| Samples | Weight ratio (wt.%) |        |       |        | Atomic ratio (at.%) |       |       |       |
|---------|---------------------|--------|-------|--------|---------------------|-------|-------|-------|
|         | N                   | C      | H     | O      | N                   | C     | H     | C/N   |
| BCN     | 60.956              | 34.677 | 2.127 | 11.913 | 46.56               | 30.87 | 22.56 | 0.663 |
| NTD-CN  | 59.354              | 34.199 | 2.303 | 13.257 | 45.22               | 30.40 | 24.39 | 0.672 |
| EHTD-CN | 59.943              | 34.788 | 2.685 | 15.187 | 43.49               | 29.44 | 27.07 | 0.677 |

337

338 Elemental contents of N, C, H, and O in BCN, NTD-CN, and EHTD-CN were measured using  
 339 an elemental analyzer. The N atom content in NTD-CN decreases significantly, owing to the  
 340 hydrolysis of terminal amino groups during the supramolecular self-assembly. Meanwhile, its  
 341 C/N ratio of 0.672 is closer to the theoretical value of 0.67 for melon-based  $g\text{-C}_3\text{N}_4$ , indicating  
 342 that the supramolecular self-assembly is beneficial for reorganizing the molecular structure  
 343 and avoiding the formation of structural defects. Subsequently, the increased C/N ratio of  
 344 EHTD-CN confirms the incorporation of pyrimidine rings. Although measured O content  
 345 exceeds actual values due to surface adsorbed  $\text{H}_2\text{O}$  and  $\text{O}_2$  from ambient exposure, EHTD-CN  
 346 demonstrates substantially higher O and H content than those in BCN and NTD-CN, confirming

347 the introduction of ETD. These results are well consistent with those from XPS, FTIR, NMR, and  
348 other analyses.

349 **Table S2.** Comparison of the photocatalytic hydrogen production performance for EHTD-CN and other recently reported carbon nitrides.

| Photocatalyst                                             | Strategy                | Light source                           | Catalyst/<br>cocatalyst | Sacrificial agent   | HER ( $\mu\text{mol g}^{-1} \text{h}^{-1}$ ) | Enhancement factor | Reference |
|-----------------------------------------------------------|-------------------------|----------------------------------------|-------------------------|---------------------|----------------------------------------------|--------------------|-----------|
| (Methyl, hydroxyl)-PHI/g-C <sub>3</sub> N <sub>4</sub>    | Post-treatment          | 300W Xe lamp ( $\geq 400 \text{ nm}$ ) | 50 mg/1 wt% Pt          | 10 vol% TEOA        | 1002                                         | 7.2                | [13]      |
| Polyelectrolytes/hydroxyl-g-C <sub>3</sub> N <sub>4</sub> | Self-assembly           | 300W Xe lamp ( $\geq 400 \text{ nm}$ ) | 10 mg/1.5 wt% Pt        | 10 vol% TEOA        | 24010                                        | 14.6               | [14]      |
| (C, hydroxyl)-g-C <sub>3</sub> N <sub>4</sub>             | Co-polymerization       | 300W Xe lamp ( $\geq 420 \text{ nm}$ ) | 20 mg/1.5 wt% Pt        | 10 vol% TEOA        | 7282                                         | 17.5               | [15]      |
| Thiophene ring-doped g-C <sub>3</sub> N <sub>4</sub>      | Co-polymerization       | 300W Xe lamp ( $\geq 420 \text{ nm}$ ) | 50 mg/3 wt% Pt          | 10 vol% TEOA        | 10341                                        | 15.2               | [16]      |
| Aromatic rings-doped g-C <sub>3</sub> N <sub>4</sub>      | Co-polymerization       | 300W Xe lamp ( $\geq 420 \text{ nm}$ ) | 50 mg/3 wt% Pt          | 10 vol% TEOA        | 2042                                         | 3.5                | [17]      |
| B-doped D-A integrated g-C <sub>3</sub> N <sub>4</sub>    | Co-polymerization       | 300W Xe lamp ( $\geq 420 \text{ nm}$ ) | 30 mg/3 wt% Pt          | 10 vol% TEOA        | 1914                                         | 5.9                | [18]      |
| N-heterobenzene-doped g-C <sub>3</sub> N <sub>4</sub>     | Co-polymerization       | 300W Xe lamp ( $\geq 420 \text{ nm}$ ) | 50 mg/1 wt% Pt          | 10 vol% TEOA        | 5732                                         | 8.4                | [19]      |
| Corrugated g-C <sub>3</sub> N <sub>4</sub> nanosheet      | Post-treatment          | 300W Xe lamp ( $\geq 420 \text{ nm}$ ) | 20 mg/0.5 wt% Pt        | 10 vol% TEOA        | 2485                                         | 40                 | [20]      |
| P-doped low-crystalline, high-crystalline homojunction    | Molten salt method      | 300W Xe lamp (AM 1.5)                  | 10 mg/MoS <sub>2</sub>  | 20 vol% lactic acid | 12090                                        | 40.3               | [21]      |
| (cyanamide/cyano)- g-C <sub>3</sub> N <sub>4</sub>        | Molten salt method      | 300W Xe lamp ( $\geq 420 \text{ nm}$ ) | 20 mg/3 wt% Pt          | 10 vol% TEOA        | 3550                                         | 13.8               | [22]      |
| Ultrathin g-C <sub>3</sub> N <sub>4</sub>                 | Supramolecular assembly | 300W Xe lamp ( $\geq 400 \text{ nm}$ ) | 20 mg/3 wt% Pt          | 10 vol% TEOA        | 2590                                         | 9.9                | [23]      |
| Few-layer g-C <sub>3</sub> N <sub>4</sub>                 | Supramolecular assembly | 300W Xe lamp ( $\geq 420 \text{ nm}$ ) | 20 mg/1 wt% Pt          | 20 vol% TEOA        | 7990                                         | 26                 | [24]      |
| Corrugated g-C <sub>3</sub> N <sub>4</sub> nanosheet      | Supramolecular assembly | 300W Xe lamp ( $\geq 420 \text{ nm}$ ) | 10 mg/0.5 wt% Pt        | 10 vol% TEOA        | 5553                                         | 12                 | [25]      |
| g-C <sub>3</sub> N <sub>4</sub> bending nanotube          | Supramolecular assembly | 300W Xe lamp ( $\geq 420 \text{ nm}$ ) | 50 mg/1 wt% Pt          | 10 vol% TEOA        | 4350                                         | 15.8               | [26]      |
| Porous V <sub>N</sub> -g-C <sub>3</sub> N <sub>4</sub>    | Supramolecular assembly | 300W Xe lamp ( $\geq 400 \text{ nm}$ ) | 20 mg/1 wt% Pt          | 10 vol% TEOA        | 5500                                         | 17.2               | [27]      |
| C-doped hollow porous g-C <sub>3</sub> N <sub>4</sub>     | Supramolecular assembly | 300W Xe lamp ( $\geq 420 \text{ nm}$ ) | 50 mg/1 wt% Pt          | 10 vol% TEOA        | 16690                                        | 139                | [28]      |
| O-doped g-C <sub>3</sub> N <sub>4</sub> nanosheet         | Supramolecular assembly | 300W Xe lamp ( $\geq 420 \text{ nm}$ ) | 50 mg/3 wt% Pt          | 10 vol% TEOA        | 1968                                         | 11.3               | [29]      |
| P-doped g-C <sub>3</sub> N <sub>4</sub> tube              | Supramolecular assembly | 300W Xe lamp ( $\geq 420 \text{ nm}$ ) | 100 mg/1 wt% Pt         | 20 vol% methanol    | 670                                          | 7                  | [30]      |

|                                                                   |                         |                               |                |                  |       |      |           |
|-------------------------------------------------------------------|-------------------------|-------------------------------|----------------|------------------|-------|------|-----------|
| (C, O)-doped g-C <sub>3</sub> N <sub>4</sub> nanobelt             | Supramolecular assembly | 300W Xe lamp ( $\geq 420$ nm) | 5 mg/3 wt% Pt  | 10 vol% TEOA     | 18380 | 79.9 | [31]      |
| (B-doped, cyano)-g-C <sub>3</sub> N <sub>4</sub> tube             | Supramolecular assembly | 300W Xe lamp ( $\geq 420$ nm) | 25 mg/3 wt% Pt | 10 vol% TEOA     | 789   | 4    | [32]      |
| Benzene-ring-doped g-C <sub>3</sub> N <sub>4</sub> tube           | Supramolecular assembly | 300W Xe lamp ( $\geq 420$ nm) | 50 mg/1 wt% Pt | 10 vol% TEOA     | 2780  | 14.9 | [33]      |
| (Benzene-ring, O)-doped g-C <sub>3</sub> N <sub>4</sub>           | Supramolecular assembly | 300W Xe lamp (AM 1.5)         | 10 mg/3 wt% Pt | 10 vol% TEOA     | 13920 | 3.7  | [34]      |
| Porous amino-rich g-C <sub>3</sub> N <sub>4</sub>                 | Supramolecular assembly | 300W Xe lamp ( $\geq 420$ nm) | 50 mg/3 wt% Pt | 10 vol% TEOA     | 3270  | 6    | [35]      |
| BTH doped D-A structural g-C <sub>3</sub> N <sub>4</sub>          | Supramolecular assembly | 300W Xe lamp ( $\geq 420$ nm) | 50 mg/1 wt% Pt | 10 vol% TEOA     | 3950  | 13.3 | [36]      |
| (Hydroxyl, carboxyl)-doped g-C <sub>3</sub> N <sub>4</sub>        | Supramolecular assembly | Xe lamp ( $\geq 420$ nm)      | 20 mg/2 wt% Pt | 30 vol% methanol | 985   | /    | [37]      |
| (Thiophene ring, cyano)-doped g-C <sub>3</sub> N <sub>4</sub>     | Supramolecular assembly | 300W Xe lamp ( $\geq 420$ nm) | 20 mg/3 wt% Pt | 20 vol% TEOA     | 4177  | 17.9 | [38]      |
| Mesopores homojunction                                            | Supramolecular assembly | 300W Xe lamp ( $\geq 420$ nm) | 20 mg/3 wt% Pt | 10 vol% TEOA     | 934   | 5    | [39]      |
| Nanotube/nanosheet homojunction                                   | Supramolecular assembly | 300W Xe lamp ( $\geq 420$ nm) | 10 mg/3 wt% Pt | 10 vol% TEOA     | 9100  | 22.8 | [40]      |
| Nanodot/nanosheet homojunction                                    | Supramolecular assembly | 300W Xe lamp (AM 1.5)         | 10 mg/3 wt% Pt | 10 vol% TEOA     | 21794 | 10.6 | [41]      |
| Pt-N <sub>3</sub> /g-C <sub>3</sub> N <sub>4</sub>                | Supramolecular assembly | 300W Xe lamp ( $\geq 420$ nm) | 20 mg/none     | 10 vol% TEOA     | 9750  | 15.4 | [42]      |
| Ag-N <sub>2</sub> C <sub>2</sub> /g-C <sub>3</sub> N <sub>4</sub> | Supramolecular assembly | 300W Xe lamp ( $\geq 420$ nm) | 20 mg/none     | 10 vol% TEOA     | 1866  | /    | [43]      |
| Ag <sub>1</sub> Co <sub>1</sub> -g-C <sub>3</sub> N <sub>4</sub>  | Supramolecular assembly | 300W Xe lamp ( $\geq 420$ nm) | 20 mg/none     | 10 vol% TEOA     | 1190  | /    | [44]      |
| C dots/S-doped g-C <sub>3</sub> N <sub>4</sub> tube/NiPc          | Supramolecular assembly | 300W Xe lamp (AM 1.5)         | 5 mg/1 wt% Pt  | 10 vol% TEOA     | 16363 | 23.2 | [45]      |
| Curled g-C <sub>3</sub> N <sub>4</sub> nanobelt (NTD-CN)          | Supramolecular assembly | 300W Xe lamp ( $\geq 420$ nm) | 50 mg/3 wt% Pt | 10 vol% TEOA     | 440   | 4.4  | This work |
| (ETD, HTD)-synergetic g-C <sub>3</sub> N <sub>4</sub>             | Supramolecular assembly | 300W Xe lamp ( $\geq 420$ nm) | 50 mg/3 wt% Pt | 10 vol% TEOA     | 3090  | 30.9 | This work |

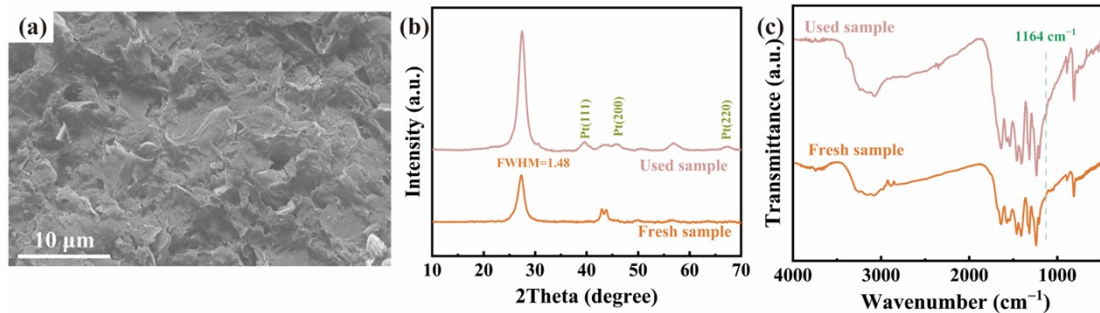

351

352 **Figure S14.** (a) SEM image of used EHTD-CN after recycling tests, (b) XRD patterns and (c) FTIR  
 353 spectra of fresh sample and used sample.

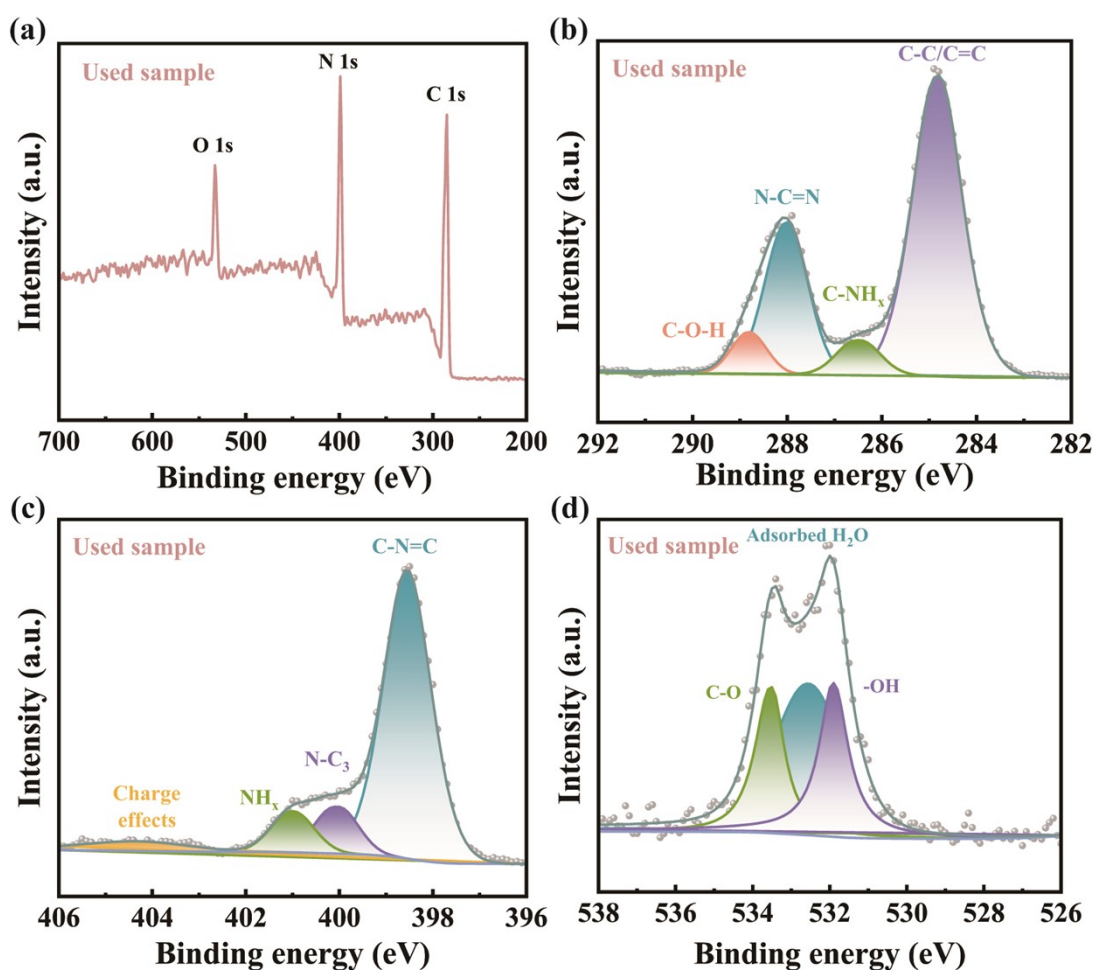

354

355 **Figure S15.** XPS spectra of used sample after 12 h cycling experiments, (a) full survey spectra, (b)  
 356 C 1s, (c) N 1s, (d) O 1s high-resolution spectra.

357 As shown in Figure S15, the XPS survey spectrum of post-cycling samples confirms  
 358 the exclusive presence of C, N, and O elements. High-resolution C 1s deconvolutions  
 359 exhibit four characteristic peaks at 284.8, 286.47, 288.1, and 288.81 eV, assigned to C-

360 C/C=C from adventitious carbon or pyrimidine structures, terminal C-NH<sub>x</sub>, sp<sup>2</sup>  
361 hybridized N-C=N, and C-OH, respectively. High-resolution N 1s spectrum exhibits  
362 characteristic peaks corresponding to C-N=C, N-C<sub>3</sub>, NH<sub>x</sub>, and π excitation, respectively.  
363 High-resolution O 1s spectrum resolve three components at 531.89, 532.56, and  
364 533.50 eV, assigned to hydroxyl groups (-OH), surface-adsorbed H<sub>2</sub>O, and C-O,  
365 respectively. The robust BIEF with EHTD-CN facilitates monodisperse distribution of Pt  
366 cocatalysts and its low loading amount, resulting in no discernible Pt signals in XPS  
367 spectrum. These results demonstrate unchanged chemical composition after 12 h  
368 operation, underscoring its exceptional structural integrity and high practical  
369 applicability. Notably, relative to the pristine g-C<sub>3</sub>N<sub>4</sub>, positive binding energy shifts in  
370 heptazine rings and terminal NH<sub>x</sub> groups attributes to h<sup>+</sup> accumulation at HTD sites  
371 (oxidation centers). Concurrently, slight positive shifts of binding energy in C-O/-OH  
372 results from electron extraction from ETD (photogenerated electron-rich sites) by Pt  
373 nanodots with high work function.

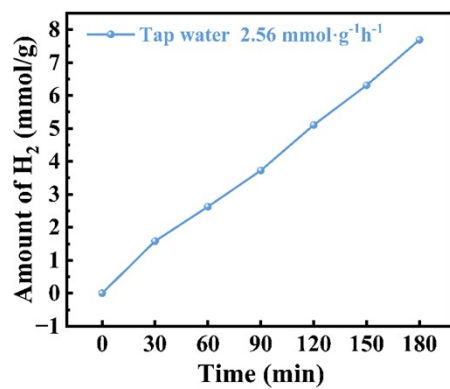

374

375 **Figure S16.** Photocatalytic hydrogen evolution curve of EHTD-CN in tap water.

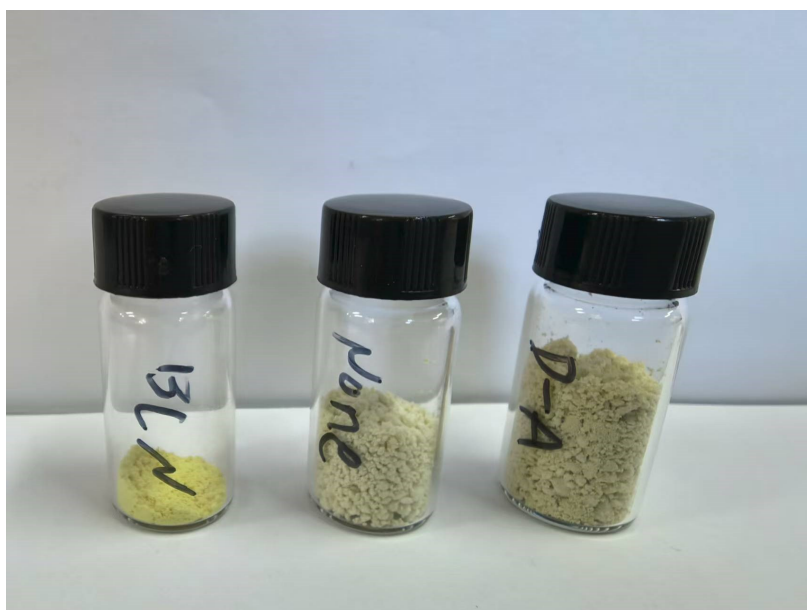

376

377 **Figure S17.** Macroscopic photograph of 0.1g of BCN (left), NTD-CN (middle), and EHTD-CN (right).

378

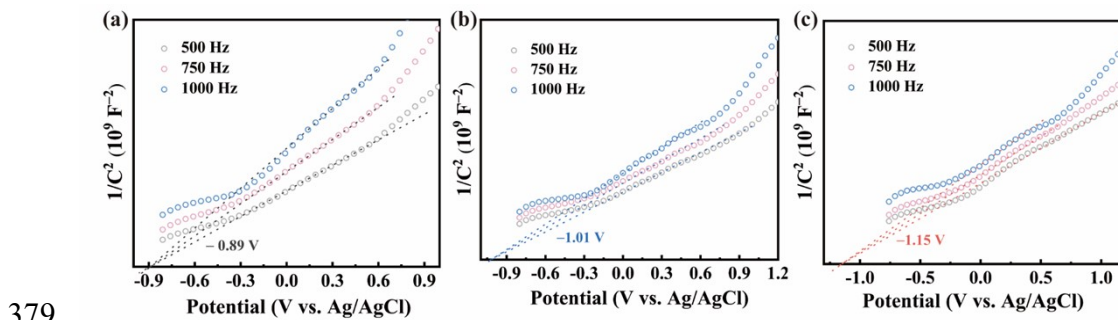

380 **Figure S18.** Mott-Schottky curves of (a) BCN, (b) NTD-CN and (c) EHTD-CN.

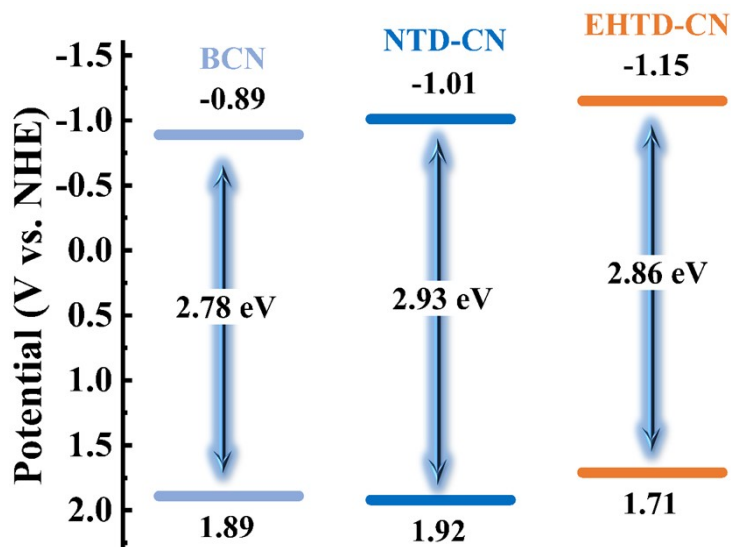

382 **Figure S19.** Schematic band structure of BCN, NTD-CN and EHTD-CN.

383 As evidenced by the Mott-Schottky plots in Figure S17, all samples exhibit positive  
 384 slopes across three measured frequencies, confirming n-type semiconductor  
 385 behavior. In addition, the flat-band potential of BCN, NTD-CN, and EHTD-CN,  
 386 evaluated from the tangent intercept of linear portions with the x-axis, are measured  
 387 as  $-0.89$ ,  $-1.01$ , and  $-1.15$  V vs. Ag/AgCl, respectively. Converting these values to the  
 388 normal hydrogen electrode (NHE) via Equation S9 gives  $-0.89$ ,  $-1.01$ , and  $-1.15$  V vs.  
 389 NHE. For n-type semiconductors, the conduction band minimum (CBM) is typically 0.2  
 390 eV more negative than its flat-band potential. Thus, their CBM are estimated to be  
 391  $-0.89$ ,  $-1.01$ , and  $-1.15$  V vs. NHE, respectively. Subsequently, their valence band  
 392 maxima are calculated as 1.89, 1.92, and 1.71 V vs. NHE, respectively.

393 The resulting band alignments are schematically illustrated in Figure S18. Quantum  
394 confinement in ultrathin curled nanobelts widens the bandgap of NTC-CN. EHTD-CN  
395 displays a more negative CBM, thermodynamically favoring proton reduction to H<sub>2</sub>.

396 
$$E_{\text{NHE}} = E_{\text{Ag/AgCl}} + 0.197 \text{ V} \quad (\text{Equation S13})$$

397 
$$E_{\text{VB}} - E_{\text{CB}} = E_{\text{g}} \quad (\text{Equation S14})$$

398 Moreover, according to the equation S11:

399 
$$E_{\text{VB-NHE}} = \Psi + E_{\text{VB-XPS}} - 4.44 \quad (\text{Equation S15})$$

400 where  $\Psi$  is the instrumental work function (4.5 eV). The obtained  $E_{\text{VB-XPS}}$  potential can  
401 be converted into  $E_{\text{VB-NHE}}$ , thus the VBM potentials of BCN, NTD-CN and EHTD-CN are  
402 1.85 V, 1.90 V, and 1.70 V vs. NHE, respectively. These results are almost consistent  
403 with the band structure obtained from Mott-Schottky curves, further confirming their  
404 reliability.

405 **Table S3.** Slope values obtained from the Mott-Schottky plots at 1000 Hz for BCN, NTD-CN, and  
406 EHTD-CN.

| Samples | Slope values          |
|---------|-----------------------|
| BCN     | $2.21 \times 10^{11}$ |
| NTD-CN  | $9.43 \times 10^{10}$ |
| EHTD-CN | $4.75 \times 10^{10}$ |

407

408 Furthermore, charge carrier densities were quantified via the slope of Mott-  
409 Schottky curves at 1000 Hz (Text S1.8). Generally, a smaller slope unequivocally  
410 reflects a higher charge carrier density. Owing to the robust BIEF, EHTD-CN exhibits  
411 the smallest Mott-Schottky slope, thereby evidencing its largest charge carrier density.

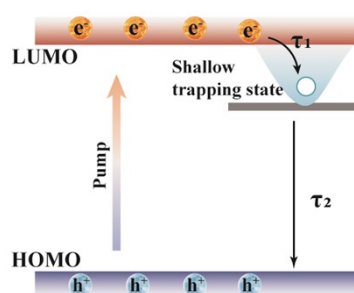

412

413 **Figure S20.** Schematic diagram of TA signal at different timescales for BCN.

414

415 **Table S4.** The fitted decay dynamics of BCN and EHTD-CN.

| Component | $\tau_1$ (ps) | $A_1$ (%) | $\tau_2$ (ps) | $A_2$ (%) | $\tau_3$ (ps) | $A_3$ (%) | $\tau_{ave}$ (ps) |
|-----------|---------------|-----------|---------------|-----------|---------------|-----------|-------------------|
| BCN       | 146.44        | 11.94     | 1296.49       | 88.06     | /             | /         | 1159              |
| EHTD-CN   | 106.64        | 2.45      | 535.88        | 11.45     | 3144.35       | 86.10     | 2771              |

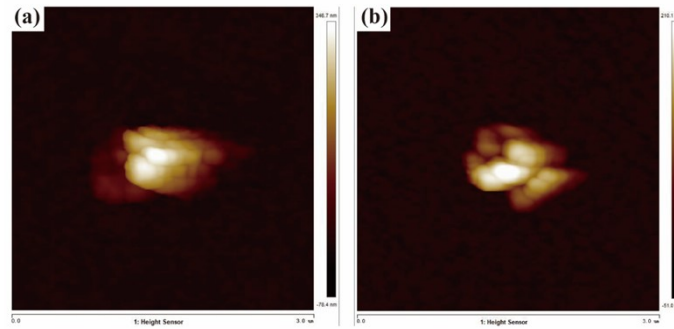

417

418 **Figure S21.** KPFM surface morphologies of BCN and EHTD-CN.

419 To accurately probe exciton dissociation and charge carrier dynamics, KPFM  
420 measurements were conducted on the regions with comparable microstructure and  
421 height profiles, eliminating the potential artifacts from topographic variations or  
422 sample content. Figure 6a–d reveal positive surface potential signals across all  
423 samples due to electron transfer to the ITO substrate, a characteristic manifestation  
424 of n-type semiconductor behavior (potential scale uniformly calibrated). The synergy  
425 of ETD and HTD enhances polarization within EHTD-CN, yielding a stronger contact  
426 potential difference ( $-76.6$  mV), which manifests as a pronounced low-potential  
427 regions at the center of its potential distribution mapping. Upon illumination, the  
428 robust BIEF in EHTD-CN promotes efficient exciton dissociation into free charge  
429 carriers, consequently indicating a more significant decrease in contact potential  
430 difference compared to BCN.

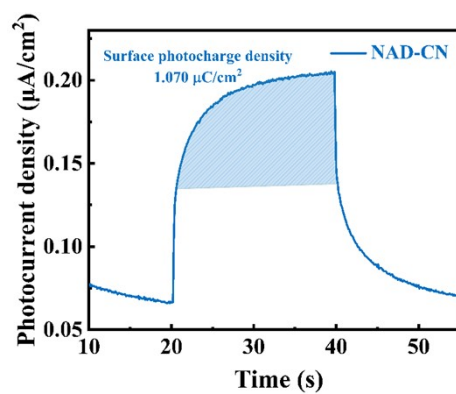

431

432 **Figure S22.** Surface photocharge density of NTD-CN.

433

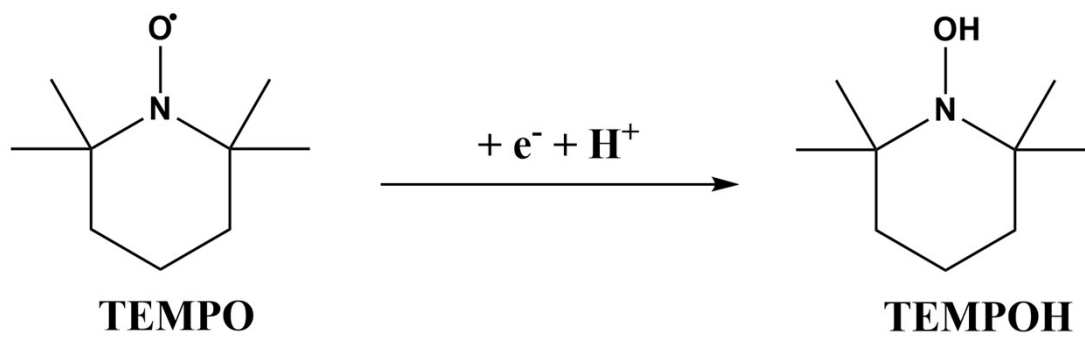

435 **Figure S23.** Schematic diagram of the conversion process for the reduction of TEMPO to TEMPOH  
436 by electrons.

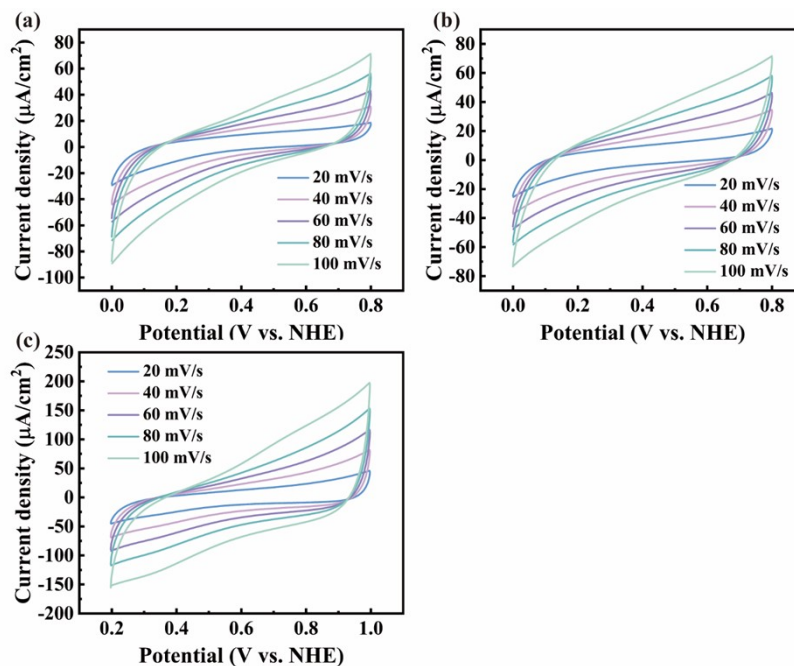

437

438 **Figure S24.** Cyclic voltammetry curves of (a) BCN, (b) NTD-CN and (c) EHTD-CN at different scan  
 439 rates.

440 Cyclic voltammetry (CV) measurements for BCN, NTD-CN, and EHTD-CN were  
 441 performed. Generally, a larger integrated area in CV curves reflects a higher specific  
 442 capacitance, signifying greater number of electrons available for reduction [46].  
 443 Variations in scan rate do not alter the characteristic shape of CV curves. However, as  
 444 the scan rates increase, the current density and corresponding CV curve area increase  
 445 for all samples. Notably, EHTD-CN exhibits a substantially larger CV curve area  
 446 compared to BCN and NTD-CN, indicating a greater population of available free  
 447 electrons. The double-layer capacitances ( $C_{dl}$ ), proportional to the electrochemically  
 448 active surface area (ECSA), were determined by fitting the linear relationship between  
 449 the scan rate and current density. NTD-CN shows only a marginal enhancement in  
 450 ECSA relative to BCN. In stark contrast, EHTD-CN demonstrates a significantly  
 451 increased ECSA. This trend in ECSA directly correlates with the photocatalytic  
 452 hydrogen production, highlighting that the simultaneous incorporation of ETD and  
 453 HTD markedly increases the density of active sites on the photocatalyst surface.

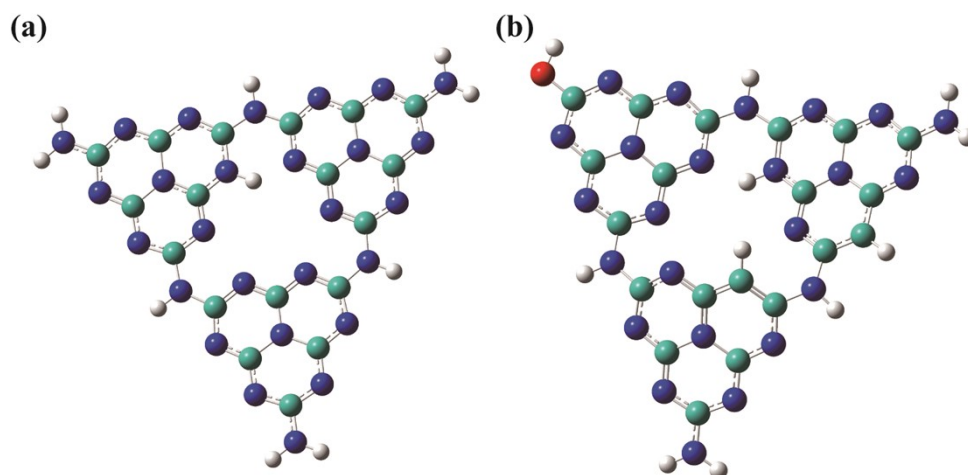

454

455 **Fig. S25.** The calculation model of H\* adsorption free energy for (a) BCN and (b) EHTD-CN. (N, blue; C,  
456 cyan; O, red; H, white)

## 457 Reference

- 458 [1] J.H. Zhao, R.H. Mu, Y. Zhang, Z.D. Yang, H.X. Zhang, H. Shi, M. Zhang, Z.F. Zheng, P.J. Yang, J  
459 Mater Chem A 10 (2022) 16873–16882.
- 460 [2] D.D. Zheng, J.M. Zhou, Z.P. Fang, T. Heil, A. Savateev, Y.F. Zhang, M. Antonietti, G.G. Zhang,  
461 X.C. Wang, J Mater Chem A 9 (2021) 27370–27379.
- 462 [3] H.T. Wang, J.Z. Jiang, L.L. Yu, J.H. Peng, Z. Song, Z.G. Xiong, N. Li, K. Xiang, J. Zou, J.P. Hsu, T.Y.  
463 Zhai, Small 19 (2023) 2301116.
- 464 [4] Q.X. Zhou, Y. Guo, Z.Q. Ye, Y.Z. Fu, Y. Guo, Y.F. Zhu, Mater. Today 58 (2022) 100–109.
- 465 [5] G.Q. Zhang, Y.S. Xu, G.S. Liu, Y.L. Li, C.X. He, X.Z. Ren, P.X. Zhang, H.W. Mi, Chinese Chem. Lett.  
466 34 (2023) 107383.
- 467 [6] C.X. Shi, R.L. Pan, J.L. Yuan, C.B. Liu, Adv. Funct. Mater. 35 (2025) 2500342.
- 468 [7] Y. Guo, S.J. Huang, Y. Guo, Z.Q. Ye, J. Nan, Q.X. Zhou, Y.F. Zhu, Appl. Catal. B-Environ. 312  
469 (2022) 121388.
- 470 [8] L.H. Xia, Z.L. Sun, Y.N. Wu, X.F. Yu, J.B. Cheng, K.S. Zhang, S. Sarina, H.Y. Zhu, H. Weerathunga,  
471 L.X. Zhang, J.F. Xia, J.Q. Yu, X.L. Yang, Chem. Eng. J. 439 (2022) 135668.
- 472 [9] H. Yang, S.D. Sun, J.L. Lyu, Q. Yang, J. Cui, Chem. Eng. J. 481 (2024) 148297.
- 473 [10] S.H. Meng, J.L. Li, S.Y. Wang, S.H. Zhan, W.P. Hu, Y. Li, Adv. Mater. 37 (2025) 2500342.
- 474 [11] H. Yang, S.D. Sun, Q. Yang, J. Cui, Nano Mater. Sci. 8 (2026) 364–437.
- 475 [12] Q. Liu, H. Cheng, T.X. Chen, T.W. Benedict Lo, Z.M. Xiang, F.X. Wang, Energy & Environmental  
476 Science 15 (2022) 225–233.
- 477 [13] L.H. Mao, B.J. Zhai, J.W. Shi, X. Kang, B.R. Lu, Y.B. Liu, C. Cheng, H. Jin, E. Lichtfouse, L.J. Guo,  
478 ACS Nano 18 (2024) 13939–13949.
- 479 [14] L. Yang, W. Zhou, M.S. Dou, X. Yue, Y.Z. Hu, T.P. Lu, Y. He, Y.Y. Du, A.N. Zhu, H.K. Yang, S.L.  
480 Lu, X.D. Chen, Adv. Funct. Mater. 35 (2025) 2500415.
- 481 [15] Z.M. Zhai, H.H. Zhang, F.S. Niu, P.Y. Liu, J.J. Zhang, H.B. Lu, ACS Nano 16 (2022) 21002–21012.
- 482 [16] S. Zhao, D.Y. An, Y.M. Zhou, J.S. Fang, S.P. Zhuo, Appl. Catal. B-Environ. Energy 358 (2024)  
483 124397.
- 484 [17] K. Li, M. Sun, W.D. Zhang, Carbon 134 (2018) 134–144.
- 485 [18] T.Y. Zhou, T.T. Li, J.Y. Hou, Y.B. Wang, B. Hu, D.S. Sun, Y.Y. Wu, W. Jiang, G.B. Che, C.B. Liu,  
486 Chem. Eng. J. 445 (2022) 136643.
- 487 [19] Z.X. Ma, X.P. Zong, Q. Hong, L.J. Niu, T.Y. Yang, W.S. Jiang, D. Qu, L. An, X.Y. Wang, Z.H. Kang,  
488 Z.C. Sun, Appl. Catal. B-Environ. 319 (2022) 121922.
- 489 [20] D.C. Jiang, S.N. Hu, Y. Qu, X. Tian, H.W. Du, C.H. Zhu, Z.J. Li, L.S. Yin, Y.P. Yuan, G. Liu, Adv.  
490 Funct. Mater. 34 (2024) 2311803.
- 491 [21] X.H. Wang, S. Xue, T.Y. Shi, Z.M. Zhao, A.L. Song, G.C. Li, L. Wang, J.F. Huang, A.L. Meng, Z.J.  
492 Li, Adv. Funct. Mater. 35 (2025) 2424853.
- 493 [22] Z.H. Yu, X.Y. Yue, J.J. Fan, Q.J. Xiang, ACS Catal. 12 (2022) 6345–6358.
- 494 [23] L.Y. Wang, Y.Z. Hong, E.L. Liu, X.X. Duan, X. Lin, J.Y. Shi, Carbon 163 (2020) 234–243.
- 495 [24] Y.T. Xiao, G.H. Tian, W. Li, Y. Xie, B.J. Jiang, C.G. Tian, D.Y. Zhao, H.G. Fu, Journal of the  
496 American Chemical Society 141 (2019) 2508–2515.
- 497 [25] G.G. Zhao, B.W. Li, X.N. Yang, X.M. Zhang, Z.F. Li, D.C. Jiang, H.W. Du, C.H. Zhu, H.Q. Li, C.  
498 Xue, Y.P. Yuan, Adv. Powder Mater. 2 (2023) 100077.

499 [26] Y.F. Wan, J. Zhang, J.W. Chen, Z.J. Liu, J.L. Fan, J. Zhang, G. Wang, R.L. Wang, *Chem. Eng. J.*  
500 417 (2021) 127956.  
501 [27] Q.C. Li, Y.W. Tong, Y.B. Zeng, X.K. Gu, M.Y. Ding, *Chem. Eng. J.* 450 (2022) 138010.  
502 [28] D. Liu, C.L. Li, C.Y. Zhao, Q. Zhao, T.Q. Niu, L.K. Pan, P.W. Xu, F.Q. Zhang, W.D. Wu, T.J. Ni,  
503 *Chem. Eng. J.* 438 (2022) 135623.  
504 [29] J.W. Zhang, S. Gong, N. Mahmood, L. Pan, X.W. Zhang, J.J. Zou, *Appl. Catal. B-Environ.* 221  
505 (2018) 9–16.  
506 [30] S.E. Guo, Z.P. Deng, M.X. Li, B.J. Jiang, C.G. Tian, Q.J. Pan, H.G. Fu, *Angew. Chem. Int. Ed.* 55  
507 (2016) 1830–1834.  
508 [31] J.J. Wu, N. Li, X.H. Zhang, H.B. Fang, Y.Z. Zheng, X. Tao, *Appl. Catal. B-Environ.* 226 (2018) 61–  
509 70.  
510 [32] L. Chen, Y.X. Wang, S. Cheng, X.L. Zhao, J.Q. Zhang, Z.M. Ao, C.C. Zhao, B. Li, S.J. Wang, S.B.  
511 Wang, H.Q. Sun, *Appl. Catal. B-Environ.* 303 (2022) 120932.  
512 [33] S.S. Li, Y.N. Peng, C. Hu, Z.H. Chen, *Appl. Catal. B-Environ.* 279 (2020) 119401.  
513 [34] G.Y. Wu, Z.Y. He, Q.H. Wang, H.B. Wang, Z.Y. Wang, P.P. Sun, Z. Mo, H.Z. Liu, H. Xu, *Journal*  
514 *of Materials Science & Technology* 195 (2024) 1–8.  
515 [35] T. Huang, J.Q. Chen, L.L. Zhang, A. Khataee, Q.F. Han, X.H. Liu, J.W. Sun, J.W. Zhu, S.G. Pan,  
516 X. Wang, Y.S. Fu, *Chinese Journal of Catalysis* 43 (2022) 497–506.  
517 [36] Z.J. Liu, J. Zhang, Y.F. Wan, J.W. Chen, Y.F. Zhou, J. Zhang, G. Wang, R.L. Wang, *Chem. Eng. J.*  
518 430 (2022) 132725.  
519 [37] G.M. Gao, L.N. Zhang, Q.F. Chen, H.L. Fan, J. Zheng, Y.F. Fang, R. Duan, X.F. Cao, X. Hu, *Chem.*  
520 *Eng. J.* 409 (2021) 127370.  
521 [38] R.L. Liu, J.Y. Lin, L.L. Zhu, X.X. Zhang, Y. Li, H. Pan, L.T. Kong, S.M. Zhu, J. Wang, *Chem. Eng. J.*  
522 484 (2024) 149507.  
523 [39] G.M. Ba, Z.W. Liang, H.P. Li, N. Du, J.Q. Liu, W.G. Hou, *Appl. Catal. B-Environ.* 253 (2019) 359–  
524 368.  
525 [40] G.Y. Wu, W. Zhang, Z. Mo, X.Y. Zhao, P.P. Sun, Q.H. Wang, P.C. Yan, X.J. She, H. Xu, *ACS Catal.*  
526 15 (2025) 8822–8832.  
527 [41] X.L. Zhu, E.L. Zhou, X.S. Tai, H.B. Zong, J.J. Yi, Z.M. Yuan, X.L. Zhao, P. Huang, H. Xu, Z.Y. Jiang,  
528 *Angew. Chem. Int. Edit.* 64 (2025) 202425439.  
529 [42] D.J. Liu, C.Y. Zhang, J.W. Shi, X.D. Jin, W. Liu, M.C. Liu, Y.B. Chen, L.J. Guo, *Appl. Catal. B-*  
530 *Environ. Energy* 361 (2025) 124655.  
531 [43] X.H. Jiang, L.S. Zhang, H.Y. Liu, D.S. Wu, F.Y. Wu, L. Tian, L.L. Liu, J.P. Zou, S.L. Luo, B.B. Chen,  
532 *Angew. Chem. Int. Ed.* 59 (2020) 23112–23116.  
533 [44] Y.Z. Liu, Y. Sun, E. Zhao, W.W. Yang, J.K. Lin, Q. Zhong, H.F. Qi, A.X. Deng, S.G. Yang, H.Y.  
534 Zhang, H. He, S.M. Liu, Z.P. Chen, S.B. Wang, *Adv. Funct. Mater.* 33 (2023) 2301840.  
535 [45] X. Miao, P. Zhang, B.L. Wang, X. Bai, W.S. Liu, *Appl. Catal. B-Environ. Energy* 357 (2024)  
536 124268.  
537 [46] Y.F. Shao, X.Q. Hao, S.D. Lu, Z.L. Jin, *Chem. Eng. J.* 454 (2023) 140123.  
538
